# Supplementary material for: Frizzled-7 is required for Xenopus heart development
Source: PubMed Central journal article supplement (PMC5769647; doi:10.1242/bio.026963), 2017-11-03
Supplement: biolopen-6-026963-s1.pdf [file biolopen-6-026963-s1.pdf]

## Supplemental Tables and Figures

**Table S1:**

| <i>fzd7</i> MO Injections | Dose (ng) | Total No. of Embryos | Anterior Defects | Reduced Heart | Anterior Defects and reduced Heart | Normal Morphology and reduced Heart | % Anterior Defects | % Reduced Heart | % Anterior Defects and reduced Heart | % Normal Morphology and reduced Heart |
|---------------------------|-----------|----------------------|------------------|---------------|------------------------------------|-------------------------------------|--------------------|-----------------|--------------------------------------|---------------------------------------|
| <b>DB</b>                 | 20        | 40                   | 8                | 1             | 1                                  | 0                                   | 20                 | 3               | 3                                    | 0                                     |
| <b>VB</b>                 | 20        | 26                   | 2                | 0             | 0                                  | 0                                   | 8                  | 0               | 0                                    | 0                                     |
| <b>DB</b>                 | 40        | 43                   | 15               | 19            | 15                                 | 4                                   | 35                 | 44              | 35                                   | 9                                     |
| <b>VB</b>                 | 40        | 47                   | 3                | 0             | 0                                  | 0                                   | 6                  | 0               | 0                                    | 0                                     |
| <b>DB</b>                 | 60        | 51                   | 49               | 36            | 34                                 | 2                                   | 96                 | 71              | 67                                   | 4                                     |
| <b>VB</b>                 | 60        | 66                   | 0                | 0             | 0                                  | 0                                   | 0                  | 0               | 0                                    | 0                                     |
| <b>DB</b>                 | 70        | 23                   | 23               | 23            | 23                                 | 0                                   | 100                | 100             | 100                                  | 0                                     |
| <b>VB</b>                 | 70        | 30                   | 5                | 0             | 0                                  | 0                                   | 17                 | 0               | 0                                    | 0                                     |

***fzd7* Morpholino dose response.** Increasing amounts of *fzd7* MO were injected at the 4 cell stage into both blastomeres of the dorsal side (DB) of the embryo and ventral side (VB) as a control. Observed phenotypes included a range of convergent extension phenotypes from severe to mild, varying degrees of anterior defects and a reduction of *nkx2-5* or *tnnic* expression.

Table S2:

| Embryo injections                                 | Total No. of Embryos | No Heart | Reduced Heart | Normal Heart | % No Heart | % Reduced Heart | % Normal Heart |
|---------------------------------------------------|----------------------|----------|---------------|--------------|------------|-----------------|----------------|
| Non-injected control                              | 76                   | 0        | 0             | 76           | 0          | 0               | 100            |
| 1ng <i>fzd7</i> SDM 2x DB                         | 80                   | 0        | 0             | 80           | 0          | 0               | 100            |
| 1ng <i>fzd7</i> SDM 2x VB                         | 79                   | 0        | 0             | 79           | 0          | 0               | 100            |
| 60ng <i>fzd7</i> MO 2x DB                         | 52                   | 26       | 15            | 11           | 50         | 29              | 21             |
| 60ng <i>fzd7</i> MO 2x VB                         | 50                   | 1        | 3             | 46           | 2          | 6               | 92             |
| 60ng <i>fzd7</i> MO + 250pg <i>lacZ</i> 2x DB     | 93                   | 31       | 41            | 21           | 33         | 44              | 23             |
| 60ng <i>fzd7</i> MO + 250pg <i>lacZ</i> 2x VB     | 79                   | 0        | 0             | 79           | 0          | 0               | 100            |
| 60ng <i>fzd7</i> MO + 500pg <i>lacZ</i> 2x DB     | 101                  | 40       | 33            | 28           | 40         | 32              | 28             |
| 60ng <i>fzd7</i> MO + 500pg <i>lacZ</i> 2x VB     | 89                   | 3        | 0             | 86           | 3          | 0               | 97             |
| 60ng <i>fzd7</i> MO + 750pg <i>lacZ</i> 2x DB     | 101                  | 27       | 53            | 21           | 27         | 52              | 21             |
| 60ng <i>fzd7</i> MO + 750pg <i>lacZ</i> 2x VB     | 74                   | 0        | 0             | 74           | 0          | 0               | 100            |
| 60ng <i>fzd7</i> MO + 1ng <i>lacZ</i> 2x DB       | 115                  | 34       | 49            | 32           | 29         | 43              | 28             |
| 60ng <i>fzd7</i> MO + 1ng <i>lacZ</i> 2x VB       | 75                   | 0        | 1             | 74           | 0          | 1               | 99             |
| 60ng <i>fzd7</i> MO + 250pg <i>fzd7</i> SDM 2x DB | 52                   | 17       | 26            | 9            | 33         | 50              | 17             |
| 60ng <i>fzd7</i> MO + 250pg <i>fzd7</i> SDM 2x VB | 53                   | 0        | 0             | 53           | 0          | 0               | 100            |
| 60ng <i>fzd7</i> MO + 500pg <i>fzd7</i> SDM 2x DB | 107                  | 16       | 42            | 49           | 15         | 39              | 46             |
| 60ng <i>fzd7</i> MO + 500pg <i>fzd7</i> SDM 2x VB | 59                   | 0        | 1             | 58           | 0          | 2               | 98             |
| 60ng <i>fzd7</i> MO + 750pg <i>fzd7</i> SDM 2x DB | 100                  | 14       | 40            | 46           | 14         | 40              | 46             |
| 60ng <i>fzd7</i> MO + 750pg <i>fzd7</i> SDM 2x VB | 75                   | 0        | 1             | 74           | 0          | 1               | 99             |
| 60ng <i>fzd7</i> MO + 1ng <i>fzd7</i> SDM 2x DB   | 133                  | 20       | 56            | 57           | 15         | 42              | 43             |
| 60ng <i>fzd7</i> MO + 1ng <i>fzd7</i> SDM 2x VB   | 107                  | 0        | 1             | 106          | 0          | 1               | 99             |

***fzd7* MO phenotype is rescued by *fzd7* SDM.** Injecting 1ng of *fzd7*SDM capped RNA does not give a cardiac phenotype. Coinjecting 60 ng *fzd7* MO with from 250pg –1ng of *lacZ* capped RNA gives between 51% and 30% embryos with no heart and between 22% and 29% embryos with normal hearts. Coinjecting with *fzd7* SDM capped RNA from 250pg- 1ng gives a dose responsive decrease of embryos with no heart 33% at 250pg to 15% at 1 ng and an increase in embryos with a normal heart from 18% at 250pg to 43% at 1ng. DB: dorsal blastomeres, VB: ventral blastomeres.

Table S3:

| Embryo injections                                          | Total No. of Embryos | Severe Cardia Bifida | Mid. Cardia Bifida | Partial Cardia Bifida | Normal Heart | % Severe Cardia Bifida | % Mid. Cardia Bifida | % Partial Cardia Bifida | % Normal Heart |
|------------------------------------------------------------|----------------------|----------------------|--------------------|-----------------------|--------------|------------------------|----------------------|-------------------------|----------------|
| Non-injected control                                       | 90                   | 0                    | 0                  | 0                     | 90           | 0                      | 0                    | 0                       | 100            |
| 1.5ng <i>dv1</i> $\Delta$ N 2x DB                          | 84                   | 0                    | 0                  | 0                     | 84           | 0                      | 0                    | 0                       | 100            |
| 1.5ng <i>dv1</i> $\Delta$ N 2x VB                          | 88                   | 0                    | 0                  | 0                     | 88           | 0                      | 0                    | 0                       | 100            |
| 500pg <i>fzd7</i> CRD + 750pg <i>lacZ</i> 2x DB            | 92                   | 29                   | 25                 | 23                    | 15           | 32                     | 27                   | 25                      | 16             |
| 500pg <i>fzd7</i> CRD + 750pg <i>lacZ</i> 2x VB            | 75                   | 0                    | 0                  | 0                     | 75           | 0                      | 0                    | 0                       | 100            |
| 500pg <i>fzd7</i> CRD + 1ng <i>lacZ</i> 2x DB              | 67                   | 25                   | 10                 | 22                    | 10           | 37                     | 15                   | 33                      | 15             |
| 500pg <i>fzd7</i> CRD + 1ng <i>lacZ</i> 2x VB              | 62                   | 0                    | 0                  | 0                     | 62           | 0                      | 0                    | 0                       | 100            |
| 500pg <i>fzd7</i> CRD + 1.25ng <i>lacZ</i> 2x DB           | 81                   | 37                   | 18                 | 17                    | 9            | 46                     | 22                   | 21                      | 11             |
| 500pg <i>fzd7</i> CRD + 1.25ng <i>lacZ</i> 2x VB           | 84                   | 0                    | 0                  | 0                     | 84           | 0                      | 0                    | 0                       | 100            |
| 500pg <i>fzd7</i> CRD + 1.5ng <i>lacZ</i> 2x DB            | 37                   | 10                   | 16                 | 8                     | 3            | 27                     | 43                   | 22                      | 8              |
| 500pg <i>fzd7</i> CRD + 1.5ng <i>lacZ</i> 2x VB            | 28                   | 0                    | 0                  | 0                     | 28           | 0                      | 0                    | 0                       | 100            |
| 500pg <i>fzd7</i> CRD + 750pg <i>dv1</i> $\Delta$ N 2x DB  | 89                   | 21                   | 23                 | 30                    | 15           | 24                     | 26                   | 33                      | 17             |
| 500pg <i>fzd7</i> CRD + 750pg <i>dv1</i> $\Delta$ N 2x VB  | 76                   | 0                    | 0                  | 0                     | 76           | 0                      | 0                    | 0                       | 100            |
| 500pg <i>fzd7</i> CRD + 1ng <i>dv1</i> $\Delta$ N 2x DB    | 91                   | 6                    | 24                 | 34                    | 27           | 7                      | 26                   | 37                      | 30             |
| 500pg <i>fzd7</i> CRD + 1ng <i>dv1</i> $\Delta$ N 2x VB    | 93                   | 0                    | 0                  | 0                     | 93           | 0                      | 0                    | 0                       | 100            |
| 500pg <i>fzd7</i> CRD + 1.25ng <i>dv1</i> $\Delta$ N 2x DB | 67                   | 8                    | 11                 | 13                    | 35           | 12                     | 16                   | 19                      | 52             |
| 500pg <i>fzd7</i> CRD + 1.25ng <i>dv1</i> $\Delta$ N 2x VB | 67                   | 0                    | 0                  | 0                     | 67           | 0                      | 0                    | 0                       | 100            |
| 500pg <i>fzd7</i> CRD + 1.5 ng <i>dv1</i> $\Delta$ N 2x DB | 20                   | 2                    | 4                  | 10                    | 4            | 10                     | 20                   | 50                      | 20             |
| 500pg <i>fzd7</i> CRD + 1.5ng <i>dv1</i> $\Delta$ N 2x VB  | 30                   | 0                    | 0                  | 0                     | 30           | 0                      | 0                    | 0                       | 100            |

***fzd7* CRD is rescued by *dv1* $\Delta$  N.** Injecting 1.5 ng of *dv1* $\Delta$ N capped RNA does not give a cardiac phenotype. Coinjecting 160 ng *fzd7* CRD with from 750pg –1.5ng of *lacZ* capped RNA gives between 33% and 46% embryos with severe cardia bifida and between 17% and 10% embryos with normal hearts. Coinjecting with *dv1* $\Delta$ N capped RNA from 750pg- 1.5ng gives a dose responsive decrease of embryos with severe cardia bifida 25% at 750pg to 7% at 1.25ng and an increase in embryos with a normal heart from 18% at 750pg to 44% at 1.25ng. DB: dorsal blastomeres, VB: ventral blastomeres.

**Figure S1:**

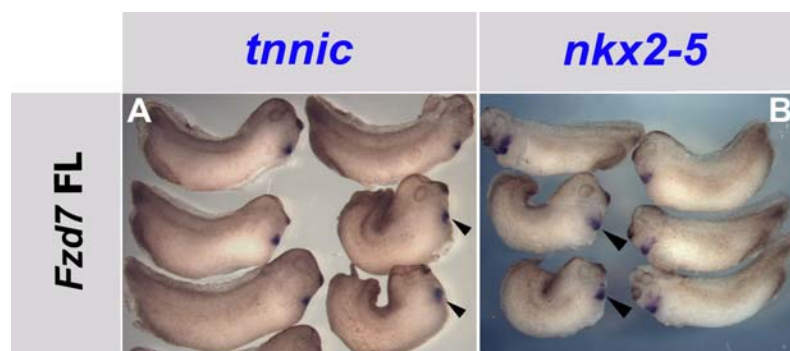

**Cardiac development is independent on the convergent extension movement defects caused by overexpression of *fzd7*.** (A, B). *fzd7* full length (250pg) injected into the dorsal blastomeres at 8 cell stage and incubated till stage-32 showing detectable *tnnic* (A) and *nkx2-5* (B) expression in both normal embryos and those with convergent extension movement defects (arrow heads in A and B).
